# Supplementary material for: Microfluidic synthesis of pure chitosan microfibers for bio-artificial liver chip
Source: Royal Society of Chemistry journal article supplement (doi:10.1039/b924987g), 2010-01-01
Supplement: b924987g.pdf [file b924987g.pdf]

## Supporting Information

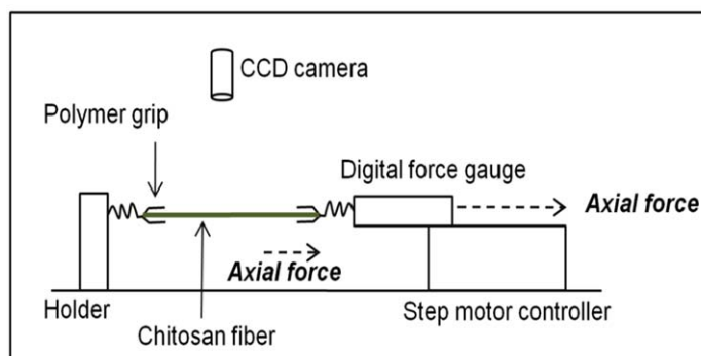

Figure S1. Schematic diagram of axial force measurement system

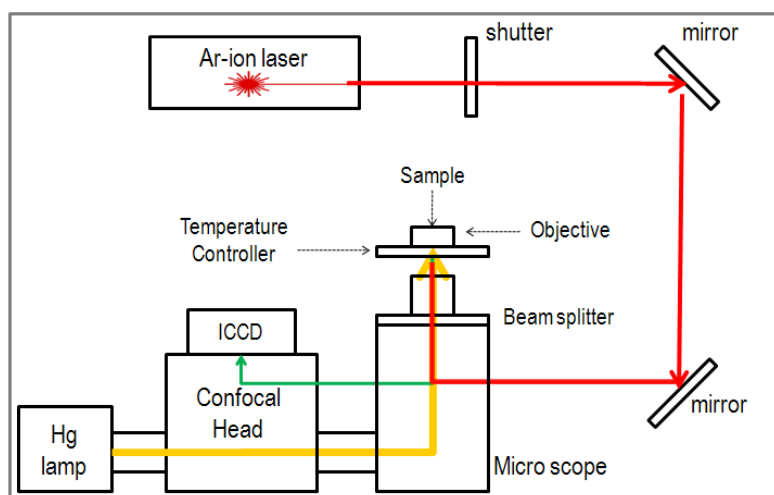

Figure S2. FRAP system for measurement of chitosan fiber diffusion
